# Supplementary material
Source: PubMed Central journal article supplement (PMC3789125)
Supplement: NIHMS510091-supplement-1_si_002.pdf [file NIHMS510091-supplement-1_si_002.pdf]

## The accuracy of quantum chemical methods for large noncovalent complexes

Robert Sedlak,<sup>a,b,\*</sup> Tomasz Janowski,<sup>c,\*</sup> Michal Pitoňák,<sup>d,e</sup> Jan Řezáč,<sup>a</sup> Peter Pulay<sup>c</sup> and Pavel Hobza<sup>a,f,\*</sup>

<sup>a</sup> Institute of Organic Chemistry and Biochemistry, Academy of Sciences of the Czech Republic, 166 10 Prague, Czech Republic; E-mail: robert.sedlak@uochb.cas.cz

<sup>b</sup> Department of Physical and Macromolecular Chemistry, Faculty of Science, Charles University in Prague, Albertov 6, 128 43 Prague, Czech Republic

<sup>c</sup> Department of Chemistry and Biochemistry, Fulbright College of Arts and Sciences, University of Arkansas, Fayetteville, Arkansas 72701, USA; E-mail: janowski@uark.edu

<sup>d</sup> Department of Physical and Theoretical Chemistry, Faculty of Natural Sciences, Comenius University, Mlynská Dolina, 842 15 Bratislava, Slovak Republic

<sup>e</sup> Computing Center of the Slovak Academy of Sciences, Dúbravská cesta č. 9, 845 35 Bratislava, Slovak Republic

<sup>f</sup> Regional Center of Advanced Technologies and Materials, Department of Physical Chemistry, Palacký University, 771 46 Olomouc, Czech Republic; E-mail: pavel.hobza@uochb.cas.cz

**Table S1**

Interaction energies in kcal/mol of the investigated complexes at different DFT-D3 levels of theory. Results for both damping methods “Zero” (Z) and “Becke-Johnson” (BJ) in combination with and without Axilrod-Teller-Mutto “3-body” (3b) correction are presented.

| method/complex      | CBH    | C3A    | C3GC   | C2C2PD | GCGC   | GGG   | PHE    |
|---------------------|--------|--------|--------|--------|--------|-------|--------|
| ref                 | -11.06 | -18.19 | -31.25 | -24.36 | -14.37 | -2.40 | -25.76 |
| B3-LYP-D3/QZ(BJ)    | -12.96 | -17.99 | -31.29 | -23.22 | -15.48 | -2.10 | -25.99 |
| B3-LYP-D3/QZ(Z)     | -13.91 | -16.26 | -28.25 | -19.15 | -14.44 | -1.76 | -26.51 |
| B3-LYP-D3/QZ(BJ+3b) | -12.26 | -16.67 | -28.87 | -21.41 | -14.44 | -1.82 | -25.61 |
| B3-LYP-D3/QZ(Z+3b)  | -13.21 | -15.04 | -25.96 | -17.45 | -13.44 | -1.50 | -26.13 |
| B-LYP-D3/QZ(BJ)     | -13.42 | -18.95 | -33.41 | -25.59 | -16.57 | -2.59 | -24.96 |
| B-LYP-D3/QZ(Z)      | -14.41 | -17.81 | -31.45 | -22.37 | -16.38 | -2.52 | -25.58 |
| B-LYP-D3/QZ(BJ+3b)  | -12.73 | -18.01 | -31.35 | -23.79 | -15.57 | -2.09 | -23.92 |
| B-LYP-D3/QZ(Z+3b)   | -13.71 | -16.57 | -29.15 | -20.66 | -15.38 | -2.26 | -25.21 |
| TPSS-D3/QZ(BJ)      | -12.35 | -16.71 | -28.58 | -21.19 | -13.38 | -1.87 | -24.23 |
| TPSS-D3/QZ(Z)       | -13.58 | -15.83 | -27.19 | -18.42 | -13.49 | -1.93 | -24.81 |
| TPSS-D3/QZ(BJ+3b)   | -11.65 | -15.42 | -26.22 | -19.43 | -12.35 | -1.60 | -23.86 |
| TPSS-D3/QZ(Z+3b)    | -12.88 | -14.61 | -24.91 | -16.72 | -12.49 | -1.67 | -24.44 |
| PW6B95-D3/QZ(BJ)    | -10.01 | -16.63 | -29.71 | -19.93 | -12.48 | -1.70 | -24.07 |
| PW6B95-D3/QZ(Z)     | -9.74  | -14.96 | -27.00 | -16.28 | -11.55 | -1.18 | -24.35 |
| PW6B95-D3/QZ(BJ+3b) | -9.32  | -15.40 | -27.42 | -18.22 | -11.47 | -1.44 | -23.70 |
| PW6B95-D3/QZ(Z+3b)  | -9.05  | -13.75 | -24.75 | -14.60 | -10.55 | -0.93 | -23.99 |
| M06-2X-D3/QZ(BJ)    | -      | -      | -      | -      | -      | -     | -      |
| M06-2X-D3/QZ(Z)     | -8.23  | -15.96 | -29.00 | -20.55 | -14.28 | -1.71 | -25.63 |
| M06-2X-D3/QZ(BJ+3b) | -      | -      | -      | -      | -      | -     | -      |
| M06-2X-D3/QZ(Z+3b)  | -7.53  | -14.77 | -26.78 | -18.88 | -13.29 | -1.45 | -25.26 |

**Table S2**

Signed errors (in kcal/mol) for the investigated complexes at different DFT-D3 level of theory with respect to the reference (QCISD(T)/CBS) data. Negative sign (“-”) indicates overestimation of the interaction energy. Results for both damping methods “Zero” (Z) and “Becke-Johnson” (BJ) in combination with and without Axilrod-Teller-Mutto 3-body correction are presented.

| method/complex      | CBH   | C3A   | C3GC  | C2C2PD | GCGC  | GGG   | PHE   |
|---------------------|-------|-------|-------|--------|-------|-------|-------|
| B3-LYP-D3/QZ(BJ)    | -1.90 | 0.20  | -0.03 | 1.14   | -1.12 | 0.30  | -0.23 |
| B3-LYP-D3/QZ(Z)     | -2.85 | 1.93  | 3.01  | 5.21   | -0.08 | 0.64  | -0.75 |
| B3-LYP-D3/QZ(BJ+3b) | -1.20 | 1.52  | 2.38  | 2.95   | -0.07 | 0.57  | 0.14  |
| B3-LYP-D3/QZ(Z+3b)  | -2.15 | 3.15  | 5.30  | 6.91   | 0.93  | 0.90  | -0.38 |
| B-LYP-D3/QZ(BJ)     | -2.36 | -0.76 | -2.15 | -1.23  | -2.21 | -0.19 | 0.80  |
| B-LYP-D3/QZ(Z)      | -3.35 | 0.38  | -0.19 | 1.99   | -2.02 | -0.12 | 0.18  |
| B-LYP-D3/QZ(BJ+3b)  | -1.67 | 0.18  | -0.09 | 0.57   | -1.20 | 0.30  | 1.84  |
| B-LYP-D3/QZ(Z+3b)   | -2.66 | 1.62  | 2.10  | 3.70   | -1.01 | 0.14  | 0.55  |
| TPSS-D3/QZ(BJ)      | -1.29 | 1.48  | 2.67  | 3.16   | 0.99  | 0.53  | 1.52  |
| TPSS-D3/QZ(Z)       | -2.52 | 2.36  | 4.06  | 5.93   | 0.88  | 0.47  | 0.94  |
| TPSS-D3/QZ(BJ+3b)   | -0.59 | 2.77  | 5.03  | 4.93   | 2.01  | 0.79  | 1.90  |
| TPSS-D3/QZ(Z+3b)    | -1.82 | 3.58  | 6.34  | 7.63   | 1.87  | 0.73  | 1.32  |
| PW6B95-D3/QZ(BJ)    | 1.04  | 1.56  | 1.55  | 4.42   | 1.89  | 0.70  | 1.68  |
| PW6B95-D3/QZ(Z)     | 1.31  | 3.23  | 4.26  | 8.07   | 2.82  | 1.22  | 1.40  |
| PW6B95-D3/QZ(BJ+3b) | 1.74  | 2.79  | 3.83  | 6.13   | 2.90  | 0.96  | 2.06  |
| PW6B95-D3/QZ(Z+3b)  | 2.01  | 4.44  | 6.50  | 9.75   | 3.82  | 1.47  | 1.77  |
| M06-2X-D3/QZ(BJ)    | -     | -     | -     | -      | -     | -     | -     |
| M06-2X-D3/QZ(Z)     | 2.83  | 2.23  | 2.25  | 3.81   | 0.09  | 0.69  | 0.13  |
| M06-2X-D3/QZ(BJ+3b) | -     | -     | -     | -      | -     | -     | -     |
| M06-2X-D3/QZ(Z+3b)  | 3.53  | 3.42  | 4.48  | 5.48   | 1.08  | 0.95  | 0.50  |

**Table S3**

Relative signed errors (in %) for the investigated complexes at different DFT-D3 level of theory with respect to the reference (QCISD(T)/CBS) data. Negative sign (“-”) indicates overestimation of the interaction energy. Results for both damping methods “Zero” (Z) and “Becke-Johnson” (BJ) in combination with and without Axilrod-Teller-Mutto 3-body correction are presented.

| method/complex      | CBH    | C3A   | C3GC  | C2C2PD | GCGC   | GGG   | PHE   |
|---------------------|--------|-------|-------|--------|--------|-------|-------|
| B3-LYP-D3/QZ(BJ)    | -17.19 | 1.08  | -0.11 | 4.66   | -7.78  | 12.35 | -0.91 |
| B3-LYP-D3/QZ(Z)     | -25.78 | 10.59 | 9.62  | 21.37  | -0.54  | 26.53 | -2.93 |
| B3-LYP-D3/QZ(BJ+3b) | -10.84 | 8.35  | 7.62  | 12.10  | -0.50  | 23.97 | 0.56  |
| B3-LYP-D3/QZ(Z+3b)  | -19.49 | 17.33 | 16.94 | 28.37  | 6.46   | 37.42 | -1.46 |
| B-LYP-D3/QZ(BJ)     | -21.34 | -4.20 | -6.89 | -5.06  | -15.35 | -8.06 | 3.09  |
| B-LYP-D3/QZ(Z)      | -30.29 | 2.06  | -0.62 | 8.16   | -14.03 | -5.14 | 0.68  |
| B-LYP-D3/QZ(BJ+3b)  | -15.11 | 1.00  | -0.30 | 2.33   | -8.35  | 12.68 | 7.15  |
| B-LYP-D3/QZ(Z+3b)   | -24.01 | 8.89  | 6.73  | 15.19  | -7.03  | 5.73  | 2.13  |
| TPSS-D3/QZ(BJ)      | -11.68 | 8.14  | 8.54  | 12.99  | 6.86   | 22.00 | 5.92  |
| TPSS-D3/QZ(Z)       | -22.80 | 12.98 | 12.99 | 24.36  | 6.09   | 19.50 | 3.66  |
| TPSS-D3/QZ(BJ+3b)   | -5.33  | 15.23 | 16.11 | 20.24  | 14.02  | 33.14 | 7.37  |
| TPSS-D3/QZ(Z+3b)    | -16.48 | 19.71 | 20.28 | 31.33  | 13.05  | 30.52 | 5.12  |
| PW6B95-D3/QZ(BJ)    | 9.45   | 8.57  | 4.95  | 18.16  | 13.15  | 29.06 | 6.53  |
| PW6B95-D3/QZ(Z)     | 11.89  | 17.75 | 13.62 | 33.14  | 19.62  | 50.75 | 5.45  |
| PW6B95-D3/QZ(BJ+3b) | 15.72  | 15.35 | 12.27 | 25.18  | 20.15  | 39.91 | 8.00  |
| PW6B95-D3/QZ(Z+3b)  | 18.14  | 24.39 | 20.81 | 40.04  | 26.56  | 61.38 | 6.88  |
| M06-2X-D3/QZ(BJ)    | -      | -     | -     | -      | -      | -     | -     |
| M06-2X-D3/QZ(Z)     | 25.59  | 12.24 | 7.19  | 15.64  | 0.61   | 28.71 | 0.50  |
| M06-2X-D3/QZ(BJ+3b) | -      | -     | -     | -      | -      | -     | -     |
| M06-2X-D3/QZ(Z+3b)  | 31.90  | 18.39 | 14.32 | 22.48  | 7.50   | 39.42 | 1.93  |

**Table S4**

The set of statistical measures (in kcal/mol) calculated for the investigated L7 set with respect to the reference (QCISD(T)/CBS) data. Results for both damping methods “Zero” (Z) and “Becke-Johnson” (BJ) in combination with and without Axilrod-Teller-Mutto 3-body correction are presented.

| method/stat measure | RMSD | MUE  | MSE   | MAX  |
|---------------------|------|------|-------|------|
| B3-LYP-D3/QZ(BJ)    | 0.95 | 0.70 | -0.24 | 1.90 |
| B3-LYP-D3/QZ(Z)     | 2.64 | 2.07 | 1.01  | 5.21 |
| B3-LYP-D3/QZ(BJ+3b) | 1.62 | 1.26 | 0.90  | 2.95 |
| B3-LYP-D3/QZ(Z+3b)  | 3.63 | 2.82 | 2.09  | 6.91 |
| B-LYP-D3/QZ(BJ)     | 1.60 | 1.39 | -1.16 | 2.36 |
| B-LYP-D3/QZ(Z)      | 1.67 | 1.17 | -0.45 | 3.35 |
| B-LYP-D3/QZ(BJ+3b)  | 1.07 | 0.84 | -0.01 | 1.84 |
| B-LYP-D3/QZ(Z+3b)   | 2.04 | 1.68 | 0.63  | 3.70 |
| TPSS-D3/QZ(BJ)      | 1.87 | 1.66 | 1.29  | 3.16 |
| TPSS-D3/QZ(Z)       | 3.06 | 2.45 | 1.73  | 5.93 |
| TPSS-D3/QZ(BJ+3b)   | 3.07 | 2.58 | 2.41  | 5.03 |
| TPSS-D3/QZ(Z+3b)    | 4.15 | 3.33 | 2.81  | 7.63 |
| PW6B95-D3/QZ(BJ)    | 2.15 | 1.83 | 1.83  | 4.42 |
| PW6B95-D3/QZ(Z)     | 3.91 | 3.19 | 3.19  | 8.07 |
| PW6B95-D3/QZ(BJ+3b) | 3.31 | 2.92 | 2.92  | 6.13 |
| PW6B95-D3/QZ(Z+3b)  | 5.08 | 4.25 | 4.25  | 9.75 |
| M06-2X-D3/QZ(BJ)    | -    | -    | -     | -    |
| M06-2X-D3/QZ(Z)     | 2.17 | 1.72 | 1.72  | 3.81 |
| M06-2X-D3/QZ(BJ+3b) | -    | -    | -     | -    |
| M06-2X-D3/QZ(Z+3b)  | 3.30 | 2.77 | 2.77  | 5.48 |

**Table S5**

The counterpoise corrected (CPC) and counterpoise uncorrected (noCPC) MP2/CBS binding energies (in kcal/mol) for all seven complexes from L7 set.

| complex | CPC   | noCPC | difference |
|---------|-------|-------|------------|
| CBH     | 11.80 | 12.91 | 1.11       |
| C3A     | 27.00 | 31.14 | 4.14       |
| C3GC    | 45.12 | 53.11 | 7.99       |
| C2C2PD  | 38.22 | 42.47 | 4.25       |
| GCGC    | 17.85 | 23.18 | 5.33       |
| GGG     | 4.15  | 6.60  | 2.46       |
| PHE     | 25.59 | 28.04 | 2.45       |

Table S5 reveals that there is relatively big difference between counterpoise corrected and uncorrected interaction energies. The absolute (relative) decrease after passing from uncorrected to corrected values range between 1.11 kcal/mol (9 %) for the CBH complex to 5.33 kcal/mol (23 %) for the GCGC complex. Enormously big relative decrease of 37 % (2.46 kcal/mol) in the case of GGG complex can be attributed to relatively small size of the complex, for which the counterpoise correction is more significant, when compared to other clusters.

This points to the fact that presented MP2/CBS values of stabilization energy based on noncounterpoise corrected data are not well converged. We would like to stress at this point that scaled MP2/CBS values presented in manuscript are based on counterpoise corrected data.

**Table S6**

Binding energies at MP2/DZ, MP2/TZ, MP2-F12/DZ, MP2-F12/TZ, MP2/CBS, scaled MP2/CBS (MP2/CBS', taken from present work) and MP2-F12/CBS (obtained by Schwenke type extrapolation) levels for GGG and GCGC complexes, are presented, in kcal/mol.

| complex | MP2/DZ | MP2-F12/DZ | MP2/TZ | MP2-F12/TZ | MP2/CBS | MP2/CBS' | MP2-F12/CBS | CBS_difference |
|---------|--------|------------|--------|------------|---------|----------|-------------|----------------|
| GGG     | 0.98   | 2.61       | 3.20   | 3.94       | 4.15    | 4.36     | 4.75        | 0.39           |
| GCGC    | 8.67   | 13.75      | 15.30  | 17.53      | 17.85   | 18.21    | 19.78       | 1.57           |

Quick inspection of the Table S6 reveals that the relative as well as absolute increase of binding energy when passing from regular to explicitly correlated calculations is significant, especially in the case of DZ basis set (0.98 vs. 2.61 kcal/mol and 8.67 vs. 13.75 kcal/mol for GGG and GCGC, respectively). It is also easy to see that absolute increase of stabilization energy lowers when passing to larger basis set (1.63 and 5.08 kcal/mol at DZ and 0.74 and 2.23 kcal/mol at TZ, for GGG and GCGC, respectively). The relative increase of the stabilization energy at CBS level equals to 14% and 11% for GGG and GCGC complexes, respectively. The same increase, when comparing explicitly correlated MP2/CBS values (MP2-F12/CBS) with respect to scaled MP2/CBS values (MP2/CBS'), equals to 9 % for both complexes. The same quantities in absolute numbers are 0.39 and 1.57 kcal/mol for GGG and GCGC, respectively.

Based on these values we can estimate the relative error in MP2/CBS numbers, presented in manuscript, to be somewhere about 9 %. Because of high computational demands of explicitly correlated calculations we are not able to present these data for remaining complexes in L7 set.

The full xyz geometry information of all seven investigated complexes.

## C2C2PD

subsystemA:1-36; subsystemB: 37-72

72

|   |           |           |           |
|---|-----------|-----------|-----------|
| C | -1.487532 | -1.231543 | -1.729000 |
| C | -0.065468 | -1.231543 | -1.729000 |
| C | 0.645564  | 0.000000  | -1.729000 |
| C | -0.065468 | 1.231543  | -1.729000 |
| C | -1.487532 | 1.231543  | -1.729000 |
| C | -2.198564 | 0.000000  | -1.729000 |
| C | 0.642292  | -2.457420 | -1.729000 |
| C | -0.093378 | -3.670823 | -1.729000 |
| C | -1.459622 | -3.670823 | -1.729000 |
| C | -2.195292 | -2.457420 | -1.729000 |
| C | -3.614084 | 0.000000  | -1.729000 |
| C | -4.297087 | -1.243810 | -1.729000 |
| C | -3.613965 | -2.427013 | -1.729000 |
| C | -4.297087 | 1.243810  | -1.729000 |
| C | -3.613965 | 2.427013  | -1.729000 |
| C | -2.195292 | 2.457420  | -1.729000 |
| C | -1.459622 | 3.670823  | -1.729000 |
| C | -0.093378 | 3.670823  | -1.729000 |
| C | 0.642292  | 2.457420  | -1.729000 |
| C | 2.060965  | 2.427013  | -1.729000 |
| C | 2.744087  | 1.243810  | -1.729000 |
| C | 2.061084  | 0.000000  | -1.729000 |
| C | 2.744087  | -1.243810 | -1.729000 |
| C | 2.060965  | -2.427013 | -1.729000 |
| H | 0.449580  | -4.607417 | -1.729000 |
| H | -2.002581 | -4.607417 | -1.729000 |
| H | -4.153600 | -3.365525 | -1.729000 |
| H | -5.379680 | -1.241892 | -1.729000 |
| H | -5.379680 | 1.241892  | -1.729000 |
| H | -4.153600 | 3.365525  | -1.729000 |
| H | -2.002581 | 4.607417  | -1.729000 |
| H | 0.449580  | 4.607417  | -1.729000 |
| H | 2.600600  | 3.365525  | -1.729000 |
| H | 3.826680  | 1.241892  | -1.729000 |
| H | 3.826680  | -1.241892 | -1.729000 |
| H | 2.600600  | -3.365525 | -1.729000 |
| C | 0.065468  | -1.231543 | 1.729000  |
| C | 1.487532  | -1.231543 | 1.729000  |
| C | 2.198564  | 0.000000  | 1.729000  |
| C | 1.487532  | 1.231543  | 1.729000  |



|   |           |           |          |
|---|-----------|-----------|----------|
| C | 0.065468  | 1.231543  | 1.729000 |
| C | -0.645564 | 0.000000  | 1.729000 |
| C | 2.195292  | -2.457420 | 1.729000 |
| C | 1.459622  | -3.670823 | 1.729000 |
| C | 0.093378  | -3.670823 | 1.729000 |
| C | -0.642292 | -2.457420 | 1.729000 |
| C | -2.061084 | 0.000000  | 1.729000 |
| C | -2.744087 | -1.243810 | 1.729000 |
| C | -2.060965 | -2.427013 | 1.729000 |
| C | -2.744087 | 1.243810  | 1.729000 |
| C | -2.060965 | 2.427013  | 1.729000 |
| C | -0.642292 | 2.457420  | 1.729000 |
| C | 0.093378  | 3.670823  | 1.729000 |
| C | 1.459622  | 3.670823  | 1.729000 |
| C | 2.195292  | 2.457420  | 1.729000 |
| C | 3.613965  | 2.427013  | 1.729000 |
| C | 4.297087  | 1.243810  | 1.729000 |
| C | 3.614084  | 0.000000  | 1.729000 |
| C | 4.297087  | -1.243810 | 1.729000 |
| C | 3.613965  | -2.427013 | 1.729000 |
| H | 2.002581  | -4.607417 | 1.729000 |
| H | -0.449580 | -4.607417 | 1.729000 |
| H | -2.600600 | -3.365525 | 1.729000 |
| H | -3.826680 | -1.241892 | 1.729000 |
| H | -3.826680 | 1.241892  | 1.729000 |
| H | -2.600600 | 3.365525  | 1.729000 |
| H | -0.449580 | 4.607417  | 1.729000 |
| H | 2.002581  | 4.607417  | 1.729000 |
| H | 4.153600  | 3.365525  | 1.729000 |
| H | 5.379680  | 1.241892  | 1.729000 |
| H | 5.379680  | -1.241892 | 1.729000 |
| H | 4.153600  | -3.365525 | 1.729000 |

### C3A

subsystemA:1-15; subsystemB: 16-87

87

|   |           |           |          |
|---|-----------|-----------|----------|
| C | -2.230000 | -0.152000 | 2.591000 |
| C | -0.950000 | -0.739000 | 2.643000 |
| C | 0.131000  | 0.153000  | 2.667000 |
| C | -1.196000 | 1.917000  | 2.639000 |
| C | 0.791000  | -1.962000 | 2.624000 |
| N | -2.328000 | 1.192000  | 2.594000 |
| N | 0.075000  | 1.492000  | 2.674000 |
| N | -0.520000 | -2.058000 | 2.616000 |
| N | 1.248000  | -0.659000 | 2.668000 |
| N | -3.378000 | -0.885000 | 2.563000 |

|   |           |           |           |
|---|-----------|-----------|-----------|
| H | -1.335000 | 2.995000  | 2.632000  |
| H | 1.478000  | -2.796000 | 2.584000  |
| H | 2.209000  | -0.350000 | 2.597000  |
| H | -4.215000 | -0.388000 | 2.285000  |
| H | -3.310000 | -1.855000 | 2.283000  |
| C | 6.220000  | -1.272000 | -0.103000 |
| C | 6.356000  | 0.086000  | -0.067000 |
| C | 5.220000  | 0.956000  | -0.165000 |
| C | 3.923000  | 0.366000  | -0.304000 |
| C | 3.782000  | -1.049000 | -0.351000 |
| C | 4.934000  | -1.892000 | -0.240000 |
| C | 2.493000  | -1.631000 | -0.480000 |
| C | 4.770000  | -3.283000 | -0.265000 |
| C | 3.506000  | -3.877000 | -0.385000 |
| C | 2.348000  | -3.043000 | -0.500000 |
| C | 3.325000  | -5.299000 | -0.390000 |
| C | 2.082000  | -5.857000 | -0.476000 |
| C | 0.902000  | -5.047000 | -0.564000 |
| C | 1.053000  | -3.625000 | -0.579000 |
| C | -0.094000 | -2.794000 | -0.668000 |
| C | 0.051000  | -1.376000 | -0.669000 |
| C | 1.342000  | -0.795000 | -0.596000 |
| C | 2.777000  | 1.198000  | -0.411000 |
| C | 1.483000  | 0.616000  | -0.539000 |
| C | 0.335000  | 1.447000  | -0.612000 |
| C | -0.954000 | 0.866000  | -0.706000 |
| C | -1.098000 | -0.545000 | -0.714000 |
| C | -1.388000 | -3.374000 | -0.698000 |
| C | -2.540000 | -2.541000 | -0.725000 |
| C | -2.397000 | -1.129000 | -0.764000 |
| C | -0.384000 | -5.600000 | -0.613000 |
| C | -1.531000 | -4.796000 | -0.667000 |
| C | -3.848000 | -3.122000 | -0.735000 |
| C | -4.970000 | -2.283000 | -0.758000 |
| C | -4.850000 | -0.887000 | -0.776000 |
| C | -3.547000 | -0.297000 | -0.768000 |
| C | -2.110000 | 1.699000  | -0.715000 |
| C | -3.403000 | 1.117000  | -0.763000 |
| C | -2.853000 | -5.350000 | -0.684000 |
| C | -3.959000 | -4.551000 | -0.713000 |
| C | -4.561000 | 1.957000  | -0.756000 |
| C | -5.853000 | 1.338000  | -0.775000 |
| C | -5.992000 | -0.020000 | -0.782000 |
| C | -4.398000 | 3.348000  | -0.723000 |
| C | -3.131000 | 3.942000  | -0.678000 |
| C | -1.967000 | 3.110000  | -0.676000 |
| C | -0.674000 | 3.692000  | -0.579000 |
| C | 0.478000  | 2.863000  | -0.555000 |
| C | 1.768000  | 3.443000  | -0.435000 |

|   |           |           |           |
|---|-----------|-----------|-----------|
| C | 2.916000  | 2.610000  | -0.345000 |
| C | 4.218000  | 3.190000  | -0.215000 |
| C | 5.337000  | 2.351000  | -0.126000 |
| C | 4.325000  | 4.619000  | -0.169000 |
| C | 1.904000  | 4.865000  | -0.368000 |
| C | 3.221000  | 5.418000  | -0.243000 |
| C | -0.527000 | 5.114000  | -0.521000 |
| C | 0.756000  | 5.667000  | -0.421000 |
| C | -2.953000 | 5.364000  | -0.625000 |
| C | -1.710000 | 5.923000  | -0.552000 |
| H | 7.095000  | -1.912000 | -0.024000 |
| H | 7.340000  | 0.535000  | 0.037000  |
| H | 5.648000  | -3.920000 | -0.181000 |
| H | 4.205000  | -5.932000 | -0.315000 |
| H | 1.965000  | -6.939000 | -0.470000 |
| H | -0.497000 | -6.682000 | -0.594000 |
| H | -5.963000 | -2.729000 | -0.763000 |
| H | -2.959000 | -6.432000 | -0.666000 |
| H | -4.953000 | -4.992000 | -0.720000 |
| H | -6.732000 | 1.979000  | -0.778000 |
| H | -6.982000 | -0.470000 | -0.790000 |
| H | -5.281000 | 3.984000  | -0.719000 |
| H | 6.324000  | 2.797000  | -0.023000 |
| H | 5.314000  | 5.059000  | -0.070000 |
| H | 3.324000  | 6.500000  | -0.201000 |
| H | 0.865000  | 6.749000  | -0.375000 |
| H | -3.838000 | 5.995000  | -0.639000 |
| H | -1.596000 | 7.004000  | -0.509000 |

### C3GC

subsystemA:1-29; subsystemB: 30-101

101

|   |           |          |           |
|---|-----------|----------|-----------|
| C | -2.997000 | 2.282000 | -1.321000 |
| C | -5.086000 | 2.109000 | -0.090000 |
| C | -4.420000 | 2.181000 | 1.091000  |
| C | -2.988000 | 2.283000 | 1.033000  |
| C | 1.169000  | 2.375000 | 1.018000  |
| C | 1.174000  | 2.413000 | -1.463000 |
| C | 3.126000  | 2.365000 | -0.406000 |
| C | 2.588000  | 2.374000 | 0.888000  |
| C | 4.698000  | 2.287000 | 1.157000  |
| N | -4.403000 | 2.166000 | -1.266000 |
| N | -2.330000 | 2.342000 | -0.140000 |
| N | -2.257000 | 2.321000 | 2.153000  |
| N | 0.537000  | 2.401000 | -0.242000 |
| N | 2.498000  | 2.388000 | -1.597000 |

|   |           |           |           |
|---|-----------|-----------|-----------|
| N | 3.587000  | 2.326000  | 1.849000  |
| N | 4.487000  | 2.320000  | -0.214000 |
| N | 0.396000  | 2.471000  | -2.566000 |
| O | -2.454000 | 2.311000  | -2.436000 |
| O | 0.482000  | 2.340000  | 2.059000  |
| H | -4.871000 | 2.039000  | -2.156000 |
| H | -6.160000 | 1.987000  | -0.158000 |
| H | -4.950000 | 2.118000  | 2.032000  |
| H | -2.709000 | 2.171000  | 3.044000  |
| H | -1.212000 | 2.331000  | 2.112000  |
| H | -0.509000 | 2.390000  | -0.222000 |
| H | 5.695000  | 2.224000  | 1.569000  |
| H | 5.179000  | 2.214000  | -0.945000 |
| H | 0.870000  | 2.330000  | -3.447000 |
| H | -0.630000 | 2.383000  | -2.529000 |
| C | 6.163000  | -0.981000 | 1.035000  |
| C | 5.791000  | -0.981000 | 2.349000  |
| C | 4.412000  | -0.949000 | 2.736000  |
| C | 3.418000  | -0.942000 | 1.709000  |
| C | 3.804000  | -0.954000 | 0.341000  |
| C | 5.189000  | -0.947000 | -0.017000 |
| C | 2.814000  | -0.909000 | -0.675000 |
| C | 5.546000  | -0.893000 | -1.371000 |
| C | 4.583000  | -0.834000 | -2.389000 |
| C | 3.196000  | -0.853000 | -2.040000 |
| C | 4.935000  | -0.753000 | -3.777000 |
| C | 3.981000  | -0.696000 | -4.751000 |
| C | 2.583000  | -0.728000 | -4.433000 |
| C | 2.203000  | -0.818000 | -3.057000 |
| C | 0.827000  | -0.850000 | -2.709000 |
| C | 0.443000  | -0.917000 | -1.339000 |
| C | 1.432000  | -0.912000 | -0.324000 |
| C | 2.043000  | -0.932000 | 2.061000  |
| C | 1.049000  | -0.929000 | 1.042000  |
| C | -0.325000 | -0.947000 | 1.391000  |
| C | -1.315000 | -0.973000 | 0.377000  |
| C | -0.932000 | -0.939000 | -0.988000 |
| C | -0.166000 | -0.827000 | -3.723000 |
| C | -1.543000 | -0.881000 | -3.373000 |
| C | -1.926000 | -0.956000 | -2.009000 |
| C | 1.588000  | -0.684000 | -5.418000 |
| C | 0.224000  | -0.738000 | -5.096000 |
| C | -2.546000 | -0.865000 | -4.392000 |
| C | -3.896000 | -0.936000 | -4.026000 |
| C | -4.295000 | -1.017000 | -2.686000 |
| C | -3.301000 | -1.010000 | -1.657000 |
| C | -2.696000 | -1.031000 | 0.728000  |
| C | -3.685000 | -1.075000 | -0.289000 |
| C | -0.804000 | -0.716000 | -6.096000 |

|   |           |           |           |
|---|-----------|-----------|-----------|
| C | -2.125000 | -0.780000 | -5.760000 |
| C | -5.069000 | -1.143000 | 0.070000  |
| C | -6.042000 | -1.163000 | -0.982000 |
| C | -5.673000 | -1.095000 | -2.297000 |
| C | -5.426000 | -1.160000 | 1.425000  |
| C | -4.466000 | -1.086000 | 2.444000  |
| C | -3.079000 | -1.024000 | 2.095000  |
| C | -2.086000 | -0.965000 | 3.112000  |
| C | -0.711000 | -0.919000 | 2.762000  |
| C | 0.281000  | -0.885000 | 3.776000  |
| C | 1.658000  | -0.887000 | 3.425000  |
| C | 2.660000  | -0.869000 | 4.444000  |
| C | 4.012000  | -0.908000 | 4.077000  |
| C | 2.238000  | -0.816000 | 5.813000  |
| C | -0.111000 | -0.841000 | 5.151000  |
| C | 0.916000  | -0.799000 | 6.151000  |
| C | -2.469000 | -0.919000 | 4.490000  |
| C | -1.475000 | -0.850000 | 5.476000  |
| C | -4.820000 | -1.045000 | 3.833000  |
| C | -3.867000 | -0.958000 | 4.808000  |
| H | 7.216000  | -0.999000 | 0.763000  |
| H | 6.547000  | -0.997000 | 3.131000  |
| H | 6.601000  | -0.890000 | -1.641000 |
| H | 5.989000  | -0.737000 | -4.041000 |
| H | 4.270000  | -0.630000 | -5.798000 |
| H | 1.881000  | -0.616000 | -6.464000 |
| H | -4.656000 | -0.933000 | -4.805000 |
| H | -0.507000 | -0.650000 | -7.140000 |
| H | -2.888000 | -0.765000 | -6.535000 |
| H | -7.094000 | -1.230000 | -0.712000 |
| H | -6.430000 | -1.112000 | -3.078000 |
| H | -6.480000 | -1.210000 | 1.693000  |
| H | 4.771000  | -0.897000 | 4.856000  |
| H | 3.002000  | -0.788000 | 6.587000  |
| H | 0.618000  | -0.758000 | 7.196000  |
| H | -1.769000 | -0.815000 | 6.523000  |
| H | -5.873000 | -1.087000 | 4.099000  |
| H | -4.158000 | -0.926000 | 5.856000  |

## CBH

subsystemA:1-56; subsystemB: 57-112

112

|   |           |           |          |
|---|-----------|-----------|----------|
| C | 20.737000 | 13.092000 | 2.121000 |
| C | 20.064000 | 11.721000 | 1.997000 |
| C | 18.539000 | 11.784000 | 2.146000 |
| C | 17.856000 | 10.417000 | 2.022000 |

|   |           |           |          |
|---|-----------|-----------|----------|
| C | 16.330000 | 10.486000 | 2.157000 |
| C | 15.644000 | 9.122000  | 2.026000 |
| C | 14.117000 | 9.196000  | 2.146000 |
| C | 13.427000 | 7.835000  | 2.005000 |
| C | 11.900000 | 7.916000  | 2.116000 |
| C | 11.204000 | 6.557000  | 1.972000 |
| C | 9.678000  | 6.644000  | 2.084000 |
| C | 8.976000  | 5.288000  | 1.945000 |
| C | 7.451000  | 5.379000  | 2.067000 |
| C | 6.746000  | 4.024000  | 1.939000 |
| C | 5.222000  | 4.116000  | 2.078000 |
| C | 4.516000  | 2.760000  | 1.964000 |
| C | 2.993000  | 2.850000  | 2.120000 |
| C | 2.297000  | 1.489000  | 2.014000 |
| H | 1.211000  | 1.588000  | 2.119000 |
| H | 20.542000 | 13.536000 | 3.104000 |
| H | 21.822000 | 13.016000 | 1.994000 |
| H | 20.357000 | 13.784000 | 1.361000 |
| H | 20.311000 | 11.278000 | 1.023000 |
| H | 20.472000 | 11.042000 | 2.758000 |
| H | 18.289000 | 12.227000 | 3.120000 |
| H | 18.130000 | 12.463000 | 1.384000 |
| H | 18.113000 | 9.971000  | 1.051000 |
| H | 18.257000 | 9.741000  | 2.789000 |
| H | 16.073000 | 10.929000 | 3.130000 |
| H | 15.930000 | 11.167000 | 1.393000 |
| H | 15.909000 | 8.675000  | 1.057000 |
| H | 16.035000 | 8.443000  | 2.797000 |
| H | 13.852000 | 9.638000  | 3.117000 |
| H | 13.728000 | 9.880000  | 1.379000 |
| H | 13.696000 | 7.390000  | 1.037000 |
| H | 13.810000 | 7.152000  | 2.777000 |
| H | 11.631000 | 8.358000  | 3.086000 |
| H | 11.518000 | 8.601000  | 1.347000 |
| H | 11.472000 | 6.113000  | 1.004000 |
| H | 11.585000 | 5.872000  | 2.743000 |
| H | 9.412000  | 7.089000  | 3.053000 |
| H | 9.297000  | 7.330000  | 1.314000 |
| H | 9.237000  | 4.841000  | 0.975000 |
| H | 9.359000  | 4.602000  | 2.714000 |
| H | 7.194000  | 5.829000  | 3.037000 |
| H | 7.066000  | 6.063000  | 1.298000 |
| H | 6.995000  | 3.575000  | 0.968000 |
| H | 7.137000  | 3.340000  | 2.706000 |
| H | 4.976000  | 4.570000  | 3.049000 |
| H | 4.828000  | 4.796000  | 1.311000 |
| H | 4.754000  | 2.307000  | 0.991000 |
| H | 4.917000  | 2.079000  | 2.728000 |
| H | 2.758000  | 3.307000  | 3.091000 |

|   |           |           |           |
|---|-----------|-----------|-----------|
| H | 2.593000  | 3.527000  | 1.354000  |
| H | 2.500000  | 1.019000  | 1.045000  |
| H | 2.651000  | 0.807000  | 2.796000  |
| C | 4.969000  | 4.711000  | -2.053000 |
| C | 4.286000  | 3.344000  | -2.177000 |
| C | 2.761000  | 3.407000  | -2.028000 |
| C | 2.088000  | 2.036000  | -2.152000 |
| C | 6.494000  | 4.642000  | -2.189000 |
| C | 7.181000  | 6.007000  | -2.057000 |
| C | 8.707000  | 5.932000  | -2.177000 |
| C | 9.398000  | 7.293000  | -2.036000 |
| C | 10.925000 | 7.212000  | -2.147000 |
| C | 11.620000 | 8.571000  | -2.003000 |
| C | 13.147000 | 8.484000  | -2.115000 |
| C | 13.848000 | 9.841000  | -1.976000 |
| C | 15.373000 | 9.749000  | -2.098000 |
| C | 16.078000 | 11.105000 | -1.970000 |
| C | 17.602000 | 11.012000 | -2.110000 |
| C | 18.308000 | 12.368000 | -1.995000 |
| C | 19.831000 | 12.278000 | -2.151000 |
| C | 20.527000 | 13.639000 | -2.046000 |
| H | 21.613000 | 13.541000 | -2.151000 |
| H | 20.173000 | 14.321000 | -2.828000 |
| H | 20.066000 | 11.821000 | -3.122000 |
| H | 20.231000 | 11.601000 | -1.385000 |
| H | 18.070000 | 12.822000 | -1.023000 |
| H | 17.907000 | 13.049000 | -2.760000 |
| H | 17.848000 | 10.558000 | -3.080000 |
| H | 17.996000 | 10.332000 | -1.342000 |
| H | 15.829000 | 11.554000 | -0.999000 |
| H | 15.687000 | 11.788000 | -2.737000 |
| H | 15.630000 | 9.299000  | -3.068000 |
| H | 15.759000 | 9.066000  | -1.329000 |
| H | 13.588000 | 10.287000 | -1.006000 |
| H | 13.465000 | 10.526000 | -2.745000 |
| H | 13.412000 | 8.039000  | -3.084000 |
| H | 13.527000 | 7.799000  | -1.345000 |
| H | 11.352000 | 9.016000  | -1.035000 |
| H | 11.240000 | 9.256000  | -2.774000 |
| H | 11.194000 | 6.770000  | -3.117000 |
| H | 11.307000 | 6.527000  | -1.378000 |
| H | 9.128000  | 7.738000  | -1.069000 |
| H | 9.015000  | 7.976000  | -2.808000 |
| H | 8.972000  | 5.490000  | -3.149000 |
| H | 9.096000  | 5.248000  | -1.410000 |
| H | 6.916000  | 6.453000  | -1.089000 |
| H | 6.789000  | 6.685000  | -2.828000 |
| H | 6.751000  | 4.200000  | -3.162000 |
| H | 6.894000  | 3.961000  | -1.425000 |

|   |           |           |           |
|---|-----------|-----------|-----------|
| H | 4.712000  | 5.157000  | -1.082000 |
| H | 4.536000  | 2.901000  | -3.152000 |
| H | 4.694000  | 2.665000  | -1.416000 |
| H | 2.514000  | 3.850000  | -1.054000 |
| H | 2.353000  | 4.086000  | -2.789000 |
| H | 1.003000  | 2.112000  | -2.026000 |
| H | 2.283000  | 1.592000  | -3.136000 |
| H | 2.468000  | 1.344000  | -1.393000 |
| H | 4.567000  | 5.387000  | -2.821000 |
| H | 20.324000 | 14.109000 | -1.076000 |

## GCGC

subsystemA:1-29; subsystemB: 30-58

58

|   |           |           |          |
|---|-----------|-----------|----------|
| C | -1.598228 | -2.949036 | 3.250000 |
| C | -4.000540 | -2.906527 | 3.250000 |
| C | -4.010728 | -1.569866 | 3.250000 |
| C | -2.719298 | -0.918718 | 3.250000 |
| N | -2.830899 | -3.586836 | 3.250000 |
| N | -1.594926 | -1.599866 | 3.250000 |
| N | -2.653199 | 0.402428  | 3.250000 |
| O | -0.598071 | -3.629523 | 3.250000 |
| H | -2.806641 | -4.581039 | 3.250000 |
| H | -4.897292 | -3.497190 | 3.250000 |
| H | -4.923580 | -1.008975 | 3.250000 |
| H | -3.479494 | 0.950075  | 3.250000 |
| H | -1.758104 | 0.864659  | 3.250000 |
| C | 1.069242  | 1.108675  | 3.250000 |
| C | 2.285426  | -1.022118 | 3.250000 |
| C | 3.455046  | 0.844410  | 3.250000 |
| C | 2.372412  | 1.689149  | 3.250000 |
| C | 4.058669  | 2.949205  | 3.250000 |
| N | 1.142384  | -0.283906 | 3.250000 |
| N | 3.479383  | -0.500070 | 3.250000 |
| N | 2.783809  | 3.007658  | 3.250000 |
| N | 4.536778  | 1.657659  | 3.250000 |
| N | 2.134562  | -2.349372 | 3.250000 |
| O | -0.013009 | 1.651379  | 3.250000 |
| H | 0.255022  | -0.761450 | 3.250000 |
| H | 4.722994  | 3.789401  | 3.250000 |
| H | 5.483879  | 1.360580  | 3.250000 |
| H | 2.960976  | -2.896653 | 3.250000 |
| H | 1.238164  | -2.794426 | 3.250000 |
| C | -1.516698 | 0.268452  | 0.000000 |
| C | -1.248162 | -2.170251 | 0.000000 |
| C | -3.291523 | -1.347683 | 0.000000 |
| C | -2.912179 | -0.027919 | 0.000000 |



|   |           |           |          |
|---|-----------|-----------|----------|
| C | -5.017031 | 0.000331  | 0.000000 |
| N | -0.757332 | -0.901161 | 0.000000 |
| N | -2.520946 | -2.449695 | 0.000000 |
| N | -4.020006 | 0.796964  | 0.000000 |
| N | -4.644678 | -1.325577 | 0.000000 |
| N | -0.345970 | -3.155346 | 0.000000 |
| O | -0.960132 | 1.343640  | 0.000000 |
| H | 0.241252  | -0.765924 | 0.000000 |
| H | -6.048336 | 0.289583  | 0.000000 |
| H | -5.236280 | -2.122611 | 0.000000 |
| H | -0.692870 | -4.083860 | 0.000000 |
| H | 0.640827  | -2.988513 | 0.000000 |
| C | 3.026394  | -1.446405 | 0.000000 |
| C | 4.944918  | 0.000029  | 0.000000 |
| C | 4.167491  | 1.087399  | 0.000000 |
| C | 2.739967  | 0.855105  | 0.000000 |
| N | 4.398535  | -1.237850 | 0.000000 |
| N | 2.230700  | -0.356844 | 0.000000 |
| N | 1.909942  | 1.885083  | 0.000000 |
| O | 2.617230  | -2.584808 | 0.000000 |
| H | 4.963288  | -2.056436 | 0.000000 |
| H | 6.017589  | 0.049270  | 0.000000 |
| H | 4.576320  | 2.077730  | 0.000000 |
| H | 2.256529  | 2.813822  | 0.000000 |
| H | 0.914102  | 1.732911  | 0.000000 |

## GGG

subsystemA:1-16; subsystemB: 17-48

48

|   |          |          |           |
|---|----------|----------|-----------|
| N | 6.392000 | 8.215000 | 35.830000 |
| C | 7.166000 | 7.124000 | 35.519000 |
| N | 6.952000 | 6.084000 | 36.266000 |
| C | 5.944000 | 6.488000 | 37.137000 |
| C | 5.338000 | 5.822000 | 38.204000 |
| O | 5.492000 | 4.688000 | 38.607000 |
| N | 4.395000 | 6.661000 | 38.871000 |
| C | 4.080000 | 7.958000 | 38.559000 |
| N | 3.196000 | 8.624000 | 39.322000 |
| N | 4.632000 | 8.592000 | 37.526000 |
| C | 5.581000 | 7.803000 | 36.882000 |
| H | 6.360000 | 9.115000 | 35.370000 |
| H | 3.905000 | 6.201000 | 39.663000 |
| H | 7.894000 | 7.170000 | 34.719000 |
| H | 2.998000 | 9.576000 | 39.055000 |
| H | 2.769000 | 8.213000 | 40.159000 |

|   |          |          |           |
|---|----------|----------|-----------|
| N | 6.665000 | 8.853000 | 40.553000 |
| C | 7.635000 | 8.238000 | 39.879000 |
| N | 7.807000 | 6.982000 | 40.232000 |
| C | 6.865000 | 6.766000 | 41.223000 |
| C | 6.571000 | 5.612000 | 41.963000 |
| O | 7.103000 | 4.485000 | 41.897000 |
| N | 5.522000 | 5.859000 | 42.882000 |
| C | 4.907000 | 7.088000 | 43.075000 |
| N | 4.067000 | 7.176000 | 44.053000 |
| N | 5.151000 | 8.148000 | 42.354000 |
| C | 6.159000 | 7.913000 | 41.451000 |
| H | 6.292000 | 9.782000 | 40.410000 |
| H | 5.265000 | 5.069000 | 43.495000 |
| H | 8.202000 | 8.733000 | 39.102000 |
| H | 3.862000 | 6.413000 | 44.701000 |
| H | 3.576000 | 8.051000 | 44.161000 |
| N | 6.807000 | 8.076000 | 45.803000 |
| C | 7.701000 | 8.119000 | 44.791000 |
| N | 8.170000 | 6.960000 | 44.522000 |
| C | 7.597000 | 6.103000 | 45.431000 |
| C | 7.781000 | 4.665000 | 45.638000 |
| O | 8.506000 | 3.870000 | 44.936000 |
| N | 7.042000 | 4.200000 | 46.733000 |
| C | 6.203000 | 5.003000 | 47.484000 |
| N | 5.593000 | 4.383000 | 48.504000 |
| N | 6.020000 | 6.303000 | 47.246000 |
| C | 6.754000 | 6.770000 | 46.226000 |
| H | 6.271000 | 8.839000 | 46.195000 |
| H | 7.067000 | 3.177000 | 46.909000 |
| H | 7.925000 | 9.033000 | 44.257000 |
| H | 5.654000 | 3.371000 | 48.664000 |
| H | 4.916000 | 4.925000 | 49.020000 |

## **PHE**

subsystemA:1-29; subsystemB: 30-87

87

|   |           |            |            |
|---|-----------|------------|------------|
| C | -4.127538 | -8.273547  | -15.224887 |
| C | -4.997304 | -7.682800  | -16.150263 |
| C | -6.056402 | -8.450504  | -16.653267 |
| C | -6.260255 | -9.759694  | -16.217693 |
| C | -5.400847 | -10.326978 | -15.275882 |
| C | -4.326629 | -9.582890  | -14.788046 |
| C | -4.820615 | -6.240143  | -16.558153 |
| C | -5.697086 | -5.258939  | -15.718866 |
| C | -5.414712 | -3.817756  | -16.179678 |
| C | -7.938789 | -6.041588  | -14.998100 |

|   |            |            |            |
|---|------------|------------|------------|
| C | -9.397268  | -6.178134  | -15.394150 |
| N | -4.474220  | -3.160081  | -15.461406 |
| N | -7.120764  | -5.492756  | -15.925400 |
| O | -7.534296  | -6.441358  | -13.892727 |
| O | -5.989625  | -3.354134  | -17.169427 |
| H | -9.632640  | -7.243384  | -15.485983 |
| H | -4.267606  | -2.202197  | -15.716412 |
| H | -10.022254 | -5.766658  | -14.596809 |
| H | -9.640526  | -5.679899  | -16.336960 |
| H | -7.504470  | -5.059242  | -16.761218 |
| H | -5.482756  | -5.389188  | -14.656556 |
| H | -5.074894  | -6.099082  | -17.615077 |
| H | -3.776712  | -5.936398  | -16.426167 |
| H | -6.727090  | -8.012860  | -17.388869 |
| H | -3.288316  | -7.699108  | -14.838954 |
| H | -7.089663  | -10.338585 | -16.615527 |
| H | -3.650657  | -10.017818 | -14.057445 |
| H | -5.563781  | -11.342466 | -14.927066 |
| H | -4.170184  | -3.512149  | -14.551471 |
| C | -3.969850  | -4.923724  | -11.758047 |
| C | -4.851107  | -6.024975  | -11.146590 |
| C | -7.159686  | -5.649346  | -10.366778 |
| C | -4.456498  | -7.385828  | -11.789262 |
| C | -5.180606  | -8.557111  | -11.171394 |
| C | -6.442163  | -8.946222  | -11.643416 |
| C | -7.132821  | -9.992330  | -11.029697 |
| C | -6.572851  | -10.666029 | -9.942816  |
| C | -5.309207  | -10.298036 | -9.478795  |
| C | -4.619419  | -9.253655  | -10.093286 |
| C | -8.609740  | -5.527168  | -10.792593 |
| C | -3.166800  | -5.116687  | -7.134488  |
| C | -4.301976  | -5.956929  | -6.502813  |
| C | -5.942867  | -4.271725  | -5.766063  |
| C | -4.394794  | -7.358398  | -7.127439  |
| C | -5.394350  | -8.255824  | -6.432851  |
| C | -5.024113  | -9.002966  | -5.307343  |
| C | -5.943664  | -9.832048  | -4.664863  |
| C | -7.251823  | -9.925929  | -5.143321  |
| C | -7.630287  | -9.186551  | -6.264839  |
| C | -6.708502  | -8.359150  | -6.905830  |
| C | -7.324477  | -3.687297  | -5.987531  |
| N | -6.261056  | -5.743958  | -11.375104 |
| N | -2.982201  | -4.469610  | -10.962843 |
| N | -2.761063  | -4.089719  | -6.351989  |
| N | -5.565673  | -5.231404  | -6.648939  |
| O | -4.139587  | -4.532793  | -12.924495 |
| O | -6.836362  | -5.645194  | -9.164767  |
| O | -2.683774  | -5.362826  | -8.250422  |
| O | -5.211745  | -3.909627  | -4.825979  |

|   |           |            |            |
|---|-----------|------------|------------|
| H | -7.975253 | -4.021614  | -5.172459  |
| H | -2.120934 | -3.406650  | -6.739461  |
| H | -7.266046 | -2.596549  | -5.941347  |
| H | -2.336485 | -3.787525  | -11.341477 |
| H | -9.199942 | -6.249716  | -10.222306 |
| H | -8.969421 | -4.524949  | -10.536114 |
| H | -7.761900 | -3.997789  | -6.939896  |
| H | -6.111309 | -5.396827  | -7.500547  |
| H | -4.110491 | -6.038844  | -5.427481  |
| H | -4.657155 | -7.265591  | -8.183670  |
| H | -3.395714 | -7.804539  | -7.083216  |
| H | -7.002167 | -7.795141  | -7.786922  |
| H | -4.003663 | -8.938422  | -4.933935  |
| H | -8.644799 | -9.259768  | -6.647536  |
| H | -5.638534 | -10.408023 | -3.795133  |
| H | -7.968855 | -10.574257 | -4.647102  |
| H | -3.347789 | -3.835840  | -5.549570  |
| H | -8.746692 | -5.704229  | -11.861657 |
| H | -6.615231 | -5.861317  | -12.329945 |
| H | -4.707388 | -6.061012  | -10.065901 |
| H | -4.678428 | -7.324391  | -12.858505 |
| H | -3.372769 | -7.507198  | -11.678320 |
| H | -6.878366 | -8.426737  | -12.492101 |
| H | -3.635739 | -8.967934  | -9.727744  |
| H | -8.111024 | -10.283061 | -11.403870 |
| H | -4.867631 | -10.814273 | -8.631675  |
| H | -7.115799 | -11.472677 | -9.458594  |
| H | -2.854914 | -4.784767  | -9.994774  |
